# Supplementary material
Source: publisher figshare collection journal article supplement (https://geolsoc.figshare.com/ndownloader/files/5426387)
Supplement: Supplementary file 1 [file 5426387]

				Appendix B- Table B1: U-Th-Pb ion-microprobe data
Note: All errors are 1?
1. Analyses are numbered 1a, 1b, 2a, 2b esc. C-core, R-rim, CR- outer part of core. Where two core or rim analyses exist within one grain these
are numbered C1, C2 esc. Analyses ommited from calculation are underlined.
2. f206% is the amount of 206Pb contributed by common (i.e., non in situ radiogenic) Pb. Figures in parantheses indicate that 204Pb counts were
indistinguishable from baseline and in these cases no corection was applied.
3. N/A indicates that no common Pb correction was applied.
							Uncorrected				Corrected3
Sample/	[U]	[Th]	[Pb]	Th/U		238U	�s	207Pb	�s	238U	�s	207Pb	�s	207Pb	�s	206Pb	�s	207-corr	�s
spot #1	ppm	ppm	ppm	meas	f206%2	206Pb	%	206Pb	%	206Pb	%	206Pb	%	206Pb		238U		age (Ma)
1. YE-11 Elat-Shlomo
1-C	938	351	116	0.374	{0.21}	9.552	2.06	0.06215	0.65		N/A			679	14	642	13	641	13
3-C	588	153	70	0.260	{0.08}	9.585	2.06	0.06034	0.95		N/A			616	20	640	13	640	13
4-C	833	258	102	0.310	{0.06}	9.463	2.06	0.06169	0.78		N/A			663	17	648	13	647	13
5-R	1004	311	124	0.310	{0.02}	9.331	2.06	0.06041	0.64		N/A			618	14	656	13	657	13
6-C	1633	1403	298	0.860	{0.54}	7.403	2.07	0.07108	0.58		N/A			960	12	817	16	812	16
6-CR	1111	962	194	0.866	{0.56}	7.660	2.07	0.07008	0.50		N/A			931	10	791	15	786	16
8-C	521	159	62	0.306	{0.10}	9.675	2.06	0.06052	0.75		N/A			622	16	634	12	634	13
12-R	344	73	30	0.211	{0.41}	12.849	2.06	0.06462	1.40		N/A			762	29	483	10	478	10
12-C	505	130	61	0.257	{0.03}	9.429	2.06	0.06162	1.09		N/A			661	23	650	13	650	13
13-R	517	185	60	0.357	{0.08}	10.087	2.06	0.06071	0.75		N/A			629	16	609	12	609	12
14-C	984	462	139	0.469	{4.04}	9.392	2.06	0.09116	0.89		N/A			1450	17	652	13	628	13
16-C	227	97	36	0.429	{0.04}	7.552	2.06	0.06433	0.90		N/A			752	19	802	16	803	16
16-R	578	108	70	0.187	{0.16}	9.337	2.06	0.06140	0.69		N/A			653	15	656	13	656	13
18-C	597	183	70	0.306	{0.23}	9.952	2.07	0.06209	0.61		N/A			677	13	617	12	616	12
19-C	634	209	75	0.329	{0.10}	9.888	2.06	0.06167	0.71		N/A			663	15	621	12	620	12
2. Elat Rehavam (YE-34)
3a-C	191	86	34	0.452	0.78	6.648	1.10	0.07446	0.77	6.700	1.10	0.06850	1.18	884	24	897	9	897	10
4a-C	161	31	18	0.193	0.41	9.838	0.99	0.06208	1.12	9.879	0.99	0.05886	1.45	562	31	622	6	623	6
6a-C	91	46	11	0.504	1.17	9.934	0.99	0.06358	1.64	10.052	0.99	0.05441	3.14	388	69	611	6	616	6
6b-C	93	36	11	0.390	0.70	9.817	1.02	0.06110	1.48	9.887	1.02	0.05563	2.67	438	58	621	6	625	6
7a-C	168	111	22	0.661	1.23	9.708	1.05	0.06848	1.04	9.829	1.04	0.05892	2.16	564	46	625	6	626	6
7b-C	162	120	21	0.739	0.60	10.020	1.00	0.06423	1.12	10.080	1.00	0.05955	1.71	587	37	610	6	610	6
8a-C	46	26	5	0.568	2.04	9.926	1.01	0.06632	2.01	10.132	1.00	0.05032	5.28	210	118	607	6	614	6
8a-R	129	71	16	0.549	0.69	9.952	1.03	0.06258	1.25	10.022	1.03	0.05719	1.92	499	42	613	6	615	6
9a-C	182	93	22	0.511	0.41	9.950	1.04	0.06259	1.05	9.991	1.04	0.05943	1.41	583	30	615	6	616	6
10a-C	296	278	75	0.939	{2.49}	6.264	1.26	0.10205	4.18		N/A			1662	76	955	11	917	13
11a-C	150	111	20	0.736	0.29	9.593	1.11	0.06079	1.10	9.621	1.11	0.05852	1.33	549	29	637	7	639	7
11a-R	1487	301	174	0.202	0.04	9.628	1.10	0.06054	0.35	9.632	1.10	0.06024	0.36	612	8	637	7	637	7
12a-C	69	43	9	0.626	0.87	9.748	1.00	0.06266	1.60	9.834	1.00	0.05585	2.68	446	58	624	6	628	6
270-C	687	12	70	0.017	0.19	10.374	1.72	0.06058	0.68	10.394	1.72	0.05908	0.80	570	17	592	10	593	10
271-C	1360	424	152	0.312	2.08	10.189	1.72	0.07630	3.52	10.405	1.73	0.06020	6.14	611	127	592	10	591	10
273-C	3837	1494	394	0.389	9.50	10.351	1.72	0.13375	0.61	11.438	1.72	0.06006	2.67	606	57	540	9	539	12
275-C	883	163	102	0.184	0.05	9.590	1.72	0.06020	0.59	9.595	1.72	0.05982	0.61	597	13	639	10	640	11
276-C	640	167	70	0.261	1.35	10.139	1.72	0.06980	0.85	10.278	1.72	0.05935	1.67	580	36	599	10	599	10
280-C	246	28	28	0.114	{0.05}	9.675	1.72	0.06068	1.08		N/A			628	23	634	10	634	11
285-C	235	119	27	0.506	0.71	10.596	1.72	0.06681	1.12	10.672	1.72	0.06131	1.76	650	37	577	10	576	10
286-C	3195	251	347	0.078	{0.01}	9.990	1.72	0.06047	0.31		N/A			620	7	615	10	615	10
287-C	128	51	14	0.402	{0.03}	10.693	1.74	0.05977	1.69		N/A			595	36	576	10	576	10
3. Timna porphyritic granite (AG-69)
1a-R	522	257	65	0.492	0.18	9.626	0.81	0.06192	0.82	9.644	0.81	0.06051	0.92	622	20	636	5	636	5
1b-R	545	362	70	0.664	0.08	9.697	0.80	0.06106	0.62	9.705	0.80	0.06044	0.66	619	14	632	5	632	5
1c-C	167	58	20	0.347	{0.10}	9.937	0.84	0.06170	1.30		N/A			664	28	618	5	617	5
1c-R	361	186	44	0.516	{0.02}	9.879	0.79	0.06142	0.73		N/A			654	16	622	5	621	5
1d-R	365	186	46	0.510	0.11	9.679	0.88	0.06097	0.88	9.690	0.88	0.06009	0.93	607	20	633	5	634	5
2a-C	173	146	23	0.843	{0.09}	9.835	0.94	0.06055	1.15		N/A			623	25	624	6	624	6
2a-R	485	183	57	0.378	{0.00}	9.970	0.79	0.06094	0.63		N/A			637	14	616	5	616	5
2b-C	175	136	23	0.774	{0.05}	9.909	0.80	0.06088	1.05		N/A			635	23	620	5	619	5
2b-R	466	155	56	0.333	0.18	9.565	0.81	0.06090	0.64	9.582	0.81	0.05950	0.73	586	16	640	5	641	5
2-CR	363	204	44	0.562	0.26	10.001	0.79	0.06336	0.76	10.027	0.79	0.06132	0.91	650	19	613	5	612	5
3a-C	264	125	32	0.472	{0.06}	9.841	0.83	0.06123	0.87		N/A			647	19	624	5	623	5
4. Shahira layered intrusion (S-3807)
3a-C	192	225	28	1.171	0.54	9.703	1.18	0.06518	1.11	9.756	1.19	0.06098	1.63	639	35	629	7	629	7
5a-C	186	244	28	1.311	0.43	9.534	1.18	0.06355	1.13	9.576	1.18	0.06022	1.50	611	32	640	7	641	7
5b-C	315	434	48	1.378	0.26	9.667	1.19	0.06181	1.35	9.692	1.19	0.05981	1.56	597	33	633	7	634	7
6a-R	101	90	14	0.889	0.32	9.515	1.19	0.06037	1.79	9.545	1.19	0.05791	2.11	526	46	642	7	645	8
6b-C	245	154	30	0.630	0.61	10.248	1.18	0.06488	1.07	10.311	1.18	0.06014	1.51	609	32	597	7	596	7
6b-R	608	537	83	0.882	0.07	9.689	1.18	0.06013	0.66	9.695	1.18	0.05962	0.69	590	15	633	7	634	7
7a-C	262	345	39	1.316	0.33	9.755	1.18	0.06269	0.97	9.787	1.18	0.06013	1.25	608	27	627	7	628	7
7a-R	267	298	40	1.116	0.20	9.302	1.18	0.05980	0.94	9.320	1.18	0.05828	1.11	540	24	657	7	660	8
7b-C	114	123	16	1.076	0.37	9.711	1.18	0.06228	1.47	9.747	1.18	0.05941	1.86	582	40	630	7	631	7
7c-C	151	176	22	1.163	0.20	9.711	1.18	0.06053	1.49	9.730	1.18	0.05898	1.68	566	36	631	7	632	7
7d-C	105	107	14	1.019	0.64	9.911	1.22	0.06410	1.57	9.975	1.22	0.05912	2.27	572	49	616	7	617	7
8a-C	286	419	45	1.467	0.29	9.536	1.18	0.06149	0.95	9.564	1.18	0.05924	1.32	576	28	641	7	643	7
8b-C	207	254	30	1.225	0.45	9.695	1.18	0.06246	1.12	9.740	1.18	0.05894	1.51	565	32	630	7	631	7
8c-C	257	372	40	1.446	0.33	9.609	1.18	0.06305	1.37	9.641	1.18	0.06047	1.65	620	35	636	7	637	7
8c-R	147	171	21	1.167	0.29	9.850	1.18	0.06183	1.71	9.879	1.18	0.05954	1.99	587	43	622	7	622	7
5. Zreir (S-4557)
4a-C	127	56	11	0.442	2.65	13.352	1.17	0.07519	1.76	13.716	1.19	0.05448	5.96	391	129	454	5	454	5
4a-R	671	593	88	0.884	0.74	9.878	1.15	0.06386	0.75	9.952	1.15	0.05808	1.27	533	28	617	7	619	7
4b-C	397	406	54	1.024	0.49	9.869	1.16	0.06386	0.95	9.918	1.16	0.06005	1.48	605	32	619	7	620	7
4b-R	396	273	52	0.689	0.17	9.594	1.17	0.06112	0.91	9.611	1.17	0.05978	1.04	596	22	638	7	639	7
4c-R	318	195	40	0.612	0.34	9.795	1.16	0.06247	1.03	9.829	1.16	0.05986	1.36	598	29	625	7	625	7
7a-C	486	319	77	0.656	0.33	7.899	1.16	0.06613	0.72	7.925	1.16	0.06359	0.88	728	19	766	8	767	9
7b-C	504	407	68	0.808	0.35	9.553	1.16	0.06128	0.82	9.587	1.16	0.05855	1.01	550	22	640	7	642	7
7c-R	204	120	25	0.588	0.49	9.762	1.16	0.06217	1.17	9.810	1.16	0.05838	1.70	544	37	626	7	628	7
7d-R	3545	14750	789	4.161	0.21	9.896	1.15	0.06183	0.33	9.916	1.15	0.06023	0.44	612	9	619	7	619	7
8a-C	323	383	46	1.188	0.38	9.585	1.15	0.06122	1.07	9.622	1.16	0.05829	1.46	541	32	637	7	640	7
8b-C	551	408	73	0.741	0.12	9.574	1.16	0.06074	0.82	9.586	1.16	0.05977	0.90	595	19	640	7	641	7
8b-R	8718	4324	1119	0.496	0.38	9.305	1.15	0.06338	0.19	9.341	1.15	0.06040	0.26	618	6	656	7	657	7
8c-R	402	249	50	0.618	0.46	9.754	1.16	0.06272	0.93	9.800	1.16	0.05911	1.26	571	27	626	7	628	7
8d-C	445	535	59	1.204	0.47	9.892	1.15	0.06321	0.94	9.939	1.16	0.05953	1.27	587	27	618	7	619	7
6. Hiran Miar (S-2351)
1a-R	151	81	18	0.536	{0.00}	10.006	1.18	0.06093	1.38		N/A			637	29	614	7	614	7
1b-C	416	499	60	1.201	{0.01}	9.892	1.18	0.06034	0.89		N/A			616	19	621	7	621	7
1b-R	240	85	29	0.354	0.20	9.742	1.16	0.05993	1.06	9.762	1.16	0.05837	1.24	544	27	629	7	631	7
2a-R	236	153	30	0.649	{0.04}	9.920	1.16	0.06083	1.35		N/A			633	29	619	7	619	7
3a-C	189	111	24	0.586	0.18	9.909	1.16	0.05892	1.28	9.927	1.16	0.05751	1.48	511	32	619	7	621	7
4a-R	169	141	22	0.839	{0.05}	9.889	1.16	0.06102	1.30		N/A			640	28	621	7	621	7
5a-C	353	293	47	0.830	0.12	9.858	1.17	0.06090	0.90	9.870	1.17	0.05994	0.99	601	21	622	7	623	7
5b-C	19	3	2	0.141	0.77	9.892	1.23	0.06283	3.90	9.969	1.24	0.05685	6.51	486	138	616	7	619	8
6a-C	266	179	34	0.674	0.10	9.966	1.16	0.06108	1.02	9.976	1.16	0.06032	1.09	615	23	616	7	616	7
7a-C	334	326	46	0.976	0.08	9.917	1.17	0.06015	0.90	9.925	1.17	0.05951	0.96	586	21	619	7	620	7
7a-R	70	32	8	0.464	0.27	9.881	1.16	0.06043	2.15	9.908	1.16	0.05834	2.57	543	55	620	7	622	7
9a-C	354	304	47	0.857	0.10	9.939	1.17	0.06084	0.88	9.950	1.17	0.06003	0.96	605	21	617	7	618	7
9a-R	116	57	14	0.494	0.22	9.980	1.16	0.06072	1.50	10.003	1.16	0.05899	1.76	567	38	614	7	615	7
10a-C	237	155	30	0.654	8.03	9.129	1.20	0.12540	6.17	9.926	1.34	0.06338	17.93	721	341	619	8	616	12
10a-R	129	85	16	0.655	0.18	10.124	�1.16	0.05951	1.74	10.142	1.16	0.05813	2.05	535	44	606	7	608	7
7. Ahdar (S-2911)
4a-C	135	65	16	0.481	{0.12}	10.297	0.93	0.06044	1.54		N/A			619	33	597	5	597	5
5a-C	829	450	100	0.542	0.24	10.130	0.91	0.06094	0.60	10.154	0.91	0.05911	0.72	571	16	606	5	606	5
8a-R	369	112	42	0.303	0.12	10.004	0.93	0.06005	1.08	10.016	0.93	0.05913	1.16	572	25	614	5	614	6
8b-C	791	479	98	0.606	0.36	10.101	0.93	0.06226	0.59	10.138	0.93	0.05943	0.87	583	19	606	5	607	6
8c-C	353	191	42	0.541	1.70	10.212	0.93	0.07178	0.92	10.388	0.93	0.05861	2.46	552	53	592	5	593	6
8c-R	1976	520	214	0.263	1.31	10.453	0.91	0.06948	0.37	10.592	0.91	0.05933	0.72	579	16	582	5	582	5
9a-C	132	54	15	0.407	0.31	10.455	0.92	0.06033	1.50	10.488	0.93	0.05790	1.89	526	41	587	5	588	5
9a-R	511	270	62	0.528	0.07	10.100	0.91	0.05978	0.75	10.107	0.91	0.05925	0.79	576	17	608	5	609	5
9b-R	993	339	116	0.342	0.17	9.996	0.91	0.06079	0.53	10.013	0.91	0.05948	0.61	585	13	614	5	614	5
8. Rahba (S-2069)
1a-C	140	130	18	0.926	0.72	10.012	1.17	0.06547	1.53	10.084	1.17	0.05990	2.28	600	49	610	7	610	7
1a-R	62	37	7	0.595	1.75	10.163	1.17	0.06830	2.44	10.344	1.18	0.05460	5.61	396	121	595	7	599	7
2a-C	75	50	9	0.666	1.44	9.786	1.16	0.06576	2.45	9.930	1.17	0.05448	5.00	391	109	619	7	623	7
2b-CR	84	69	11	0.816	1.01	9.948	1.16	0.06563	1.97	10.050	1.16	0.05779	3.22	522	69	612	7	613	7
3a-CR	119	115	16	0.968	0.71	9.907	1.16	0.06441	1.53	9.978	1.16	0.05886	2.26	562	49	616	7	617	7
3b-C	104	68	13	0.656	0.78	10.100	1.16	0.06197	1.72	10.180	1.16	0.05588	2.69	447	59	604	7	607	7
3b-R	97	77	12	0.794	0.46	10.086	1.16	0.06114	1.76	10.133	1.16	0.05755	2.31	513	50	607	7	609	7
5a-C	264	191	33	0.726	0.25	10.163	1.16	0.06179	1.06	10.189	1.16	0.05987	1.27	599	27	604	7	604	7
9. Sama (S-3704)
1a-C	169	224	25	1.319	{0.07}	9.989	1.10	0.05971	1.23		N/A			593	26	615	7	616	7
1a-R	172	138	22	0.802	{0.09}	10.352	1.16	0.05989	1.28		N/A			599	28	594	7	594	7
1b-R	668	958	98	1.433	0.04	10.141	1.16	0.06030	0.66	10.144	1.16	0.06001	0.68	604	15	606	7	606	7
2a-R	106	71	13	0.670	0.97	10.061	1.22	0.06471	4.11	10.160	1.23	0.05712	6.81	496	143	605	7	607	8
3a-C	155	126	20	0.814	0.21	10.138	1.16	0.06001	1.32	10.160	1.16	0.05835	1.64	543	35	605	7	606	7
3a-R	208	193	28	0.928	{0.00}	10.114	1.18	0.06107	1.22		N/A			642	26	608	7	607	7
4a-C	83	67	10	0.816	0.52	10.465	1.16	0.06187	1.75	10.519	1.17	0.05783	2.50	523	54	585	7	587	7
4a-R	358	440	49	1.230	0.43	10.517	1.16	0.06260	0.84	10.563	1.16	0.05923	1.14	576	25	583	6	583	7
5a-C	89	83	11	0.929	0.65	11.019	1.28	0.06198	1.73	11.090	1.29	0.05695	3.19	490	69	557	7	558	7
5a-R	120	115	16	0.960	0.30	10.144	1.16	0.05818	1.72	10.175	1.16	0.05581	2.11	445	46	604	7	608	7
6a-C	78	75	11	0.962	0.21	10.005	1.16	0.05854	1.82	10.025	1.16	0.05693	2.12	489	46	613	7	616	7
6b-R	32	22	4	0.671	0.64	10.056	1.20	0.05952	3.43	10.121	1.20	0.05452	4.62	393	100	607	7	612	7
7a-C	344	498	51	1.448	0.10	10.072	1.16	0.06045	0.86	10.082	1.16	0.05963	0.93	590	20	610	7	610	7
7b-C	182	215	24	1.177	0.29	10.651	1.17	0.06156	1.17	10.682	1.17	0.05933	1.45	579	31	577	6	577	7
8a-C	333	471	49	1.417	0.16	10.167	1.16	0.06199	0.88	10.184	1.16	0.06073	0.99	630	21	604	7	603	7
8a-R	227	189	30	0.836	0.11	10.017	1.16	0.06004	1.05	10.029	1.16	0.05916	1.13	573	24	613	7	614	7
9a-C	743	1203	114	1.619	1.06	10.119	1.23	0.06832	0.89	10.227	1.23	0.06011	1.47	608	31	601	7	601	7
9a-R	210	130	18	0.620	0.55	15.637	1.18	0.06355	1.52	15.723	1.18	0.05931	2.09	578	45	397	5	395	5
10. Lathi (S-1610)
1a-C	85	87	12	1.019	0.25	10.183	1.21	0.06276	1.67	10.208	1.21	0.06086	2.09	634	44	602	7	602	7
1a-R	349	181	41	0.518	0.14	10.302	1.21	0.06050	0.89	10.316	1.21	0.05940	0.99	582	21	596	7	597	7
2a-C	72	45	9	0.633	1.03	10.081	1.22	0.06482	2.14	10.186	1.23	0.05676	4.03	482	87	604	7	606	7
2a-R	285	146	34	0.512	0.32	9.993	1.23	0.06049	1.09	10.026	1.23	0.05799	1.37	529	30	613	7	615	7
2b-C	226	92	26	0.407	0.38	10.052	1.21	0.06068	1.21	10.090	1.21	0.05776	1.55	521	34	609	7	611	7
2b-R	391	248	47	0.635	0.34	10.312	1.21	0.06176	1.10	10.347	1.21	0.05912	1.36	572	29	595	7	595	7
2c-R	219	247	28	1.127	0.93	10.872	1.21	0.06420	1.37	10.974	1.21	0.05695	2.16	490	47	562	7	564	7
2c-R1	81	61	10	0.745	0.70	10.004	1.23	0.06237	1.79	10.074	1.23	0.05694	2.75	489	60	610	7	613	7
2c-R2	1104	54	121	0.049	0.07	9.815	1.23	0.06063	0.55	9.822	1.23	0.06005	0.58	605	12	625	7	625	7
3a-C	130	128	17	0.977	0.44	10.294	1.22	0.06209	1.44	10.339	1.22	0.05870	1.90	556	41	595	7	596	7
3a-R	354	194	43	0.548	0.16	10.161	1.21	0.06055	0.87	10.177	1.21	0.05934	1.00	580	22	604	7	605	7
3b-C	124	134	17	1.075	0.28	10.157	1.21	0.06241	1.46	10.185	1.21	0.06027	1.76	613	37	604	7	604	7
3b-R	197	89	23	0.453	0.25	10.435	1.21	0.06088	1.25	10.460	1.21	0.05897	1.48	566	32	589	7	589	7
4a-R	322	197	40	0.613	0.18	9.992	1.21	0.06093	0.95	10.010	1.21	0.05955	1.07	587	23	614	7	614	7
4b-R	281	141	33	0.503	0.35	10.141	1.21	0.06010	1.15	10.176	1.21	0.05740	1.48	507	32	604	7	606	7
4c-R	285	141	34	0.496	0.17	10.210	1.21	0.06155	1.05	10.228	1.21	0.06021	1.17	611	25	601	7	601	7
4d-R	227	110	27	0.483	4.53	9.724	1.21	0.09368	1.33	10.186	1.22	0.05848	4.12	548	88	604	7	605	8
4e-R	248	117	30	0.472	0.27	9.808	1.21	0.06030	1.12	9.835	1.21	0.05819	1.35	537	29	624	7	626	7
6a-R	262	130	32	0.498	0.56	9.914	1.21	0.06428	1.10	9.970	1.21	0.05992	1.61	601	34	616	7	616	7
6b-r	256	125	30	0.490	0.48	10.107	1.21	0.06323	1.17	10.156	1.21	0.05951	1.58	586	34	605	7	606	7
6c-R	235	125	28	0.531	0.35	10.214	1.21	0.06403	1.24	10.250	1.21	0.06129	1.71	649	36	600	7	599	7
11. Sulaf (S-2199)
1a-C	345	547	62	1.587	0.06	9.363	1.33	0.06011	0.72	9.368	1.33	0.05967	0.75	592	16	654	8	655	9
1a-R	219	92	26	0.421	0.11	10.189	1.27	0.06037	1.04	10.200	1.27	0.05951	1.13	586	24	603	7	603	8
3a-R	341	237	43	0.696	0.07	10.242	1.16	0.05949	0.82	10.249	1.16	0.05891	0.90	564	19	600	7	601	7
4a-R	1191	685	144	0.575	0.23	10.322	1.20	0.06241	0.63	10.346	1.20	0.06062	0.74	626	16	595	7	594	7
6a-R	386	115	30	0.298	10.25	13.709	1.31	0.13939	4.27	15.275	1.41	0.05985	17.42	598	338	409	6	406	9
6b-C	117	51	14	0.439	{0.06}	10.287	1.16	0.06075	1.35		N/A			630	29	598	7	597	7
6c-C	129	52	15	0.404	0.14	10.119	1.16	0.06014	1.28	10.133	1.16	0.05906	1.41	569	30	607	7	607	7
6d-C1	232	115	27	0.493	0.18	10.287	1.20	0.05994	1.13	10.305	1.20	0.05854	1.27	550	28	597	7	598	7
6d-C2	86	26	9	0.308	0.19	10.370	1.16	0.05837	1.85	10.389	1.16	0.05690	2.07	488	45	592	7	595	7
6d-R	170	66	20	0.389	{0.07}	9.866	1.21	0.05959	1.34		N/A			589	29	622	7	623	7
8a-C	224	79	10	0.354	0.95	27.708	1.17	0.06535	1.71	27.973	1.17	0.05796	3.42	528	73	226	3	224	3
9a-C	159	152	20	0.958	0.20	10.513	1.19	0.06037	1.19	10.534	1.19	0.05883	1.38	561	30	585	7	585	7
9b-r	754	350	77	0.464	1.13	11.799	1.18	0.06971	1.17	11.934	1.18	0.06097	1.68	638	36	519	6	517	6
10a-C	636	258	59	0.405	1.72	12.717	1.25	0.07317	4.23	12.940	1.24	0.05982	7.51	597	155	480	6	478	6
12. Abu-K'sheib (S-2695)
6a-C	170	170	23	1.001	{0.08}	10.410	1.14	0.05935	1.23		N/A			580	26	591	6	592	7
6a-R	258	160	31	0.619	0.10	10.323	1.18	0.06072	1.35	10.334	1.18	0.05991	1.42	600	30	595	7	595	7
8a-C	95	93	13	0.985	0.43	10.129	1.12	0.06009	1.93	10.172	1.12	0.05678	2.72	483	59	605	6	607	7
8a-R	190	112	23	0.588	{0.10}	10.467	1.10	0.05977	1.22		N/A			595	26	588	6	588	6
8b-C	382	447	57	1.170	8.67	9.126	3.37	0.12946	15.20	9.992	4.20	0.06246	48.62	690	795	615	25	613	27
8b-R	219	104	26	0.476	4.51	9.924	1.15	0.09800	3.87	10.393	1.19	0.06313	8.12	713	164	592	7	589	8
10a-C	136	163	18	1.199	0.22	10.427	1.10	0.06043	1.71	10.451	1.10	0.05869	1.96	556	42	589	6	590	6
10a-R	388	236	46	0.610	{0.07}	10.581	1.12	0.06034	1.02		N/A			616	22	582	6	581	6
10b-R	292	153	33	0.525	0.11	10.792	1.09	0.06009	1.11	10.804	1.09	0.05923	1.22	576	26	571	6	571	6
13. Malaha (S-4917)
1a-C	545	211	57	0.386	0.98	11.200	1.26	0.06765	0.78	11.310	1.27	0.06007	1.92	606	41	546	7	545	7
1a-R	278	101	32	0.364	0.13	10.281	1.16	0.06028	1.13	10.295	1.16	0.05925	1.24	576	27	598	7	598	7
2a-C	579	363	72	0.626	0.06	10.074	1.16	0.05932	0.78	10.080	1.16	0.05884	0.82	561	18	610	7	611	7
2a-R	288	112	34	0.390	0.06	10.086	1.22	0.06050	0.90	10.092	1.22	0.06004	0.94	605	20	609	7	609	7
2b-C	186	66	21	0.353	0.18	10.194	1.20	0.06009	1.16	10.212	1.20	0.05865	1.39	554	30	602	7	603	7
3a-C	1691	874	215	0.517	0.07	9.594	1.21	0.06042	0.36	9.601	1.21	0.05987	0.39	599	9	639	7	640	8
3a-R	256	85	29	0.331	0.26	10.350	1.19	0.06150	1.10	10.377	1.19	0.05951	1.30	586	28	593	7	593	7
3b-R	369	147	43	0.399	0.05	10.166	1.16	0.06078	0.81	10.170	1.16	0.06040	0.84	618	18	605	7	604	7
4a-C	196	61	22	0.310	0.11	10.062	1.16	0.05985	1.07	10.073	1.16	0.05901	1.17	567	25	610	7	611	7
4a-R	292	96	33	0.327	0.28	10.377	1.16	0.06171	0.90	10.405	1.16	0.05958	1.10	588	24	592	7	592	7
5a-R	224	73	26	0.327	0.09	10.171	1.16	0.05880	1.23	10.180	1.16	0.05810	1.29	534	28	604	7	605	7
6a-C	308	164	37	0.531	0.14	10.108	1.16	0.06168	0.84	10.122	1.16	0.06061	0.95	625	20	607	7	607	7
7a-C	479	181	56	0.378	1.27	9.952	1.16	0.07060	1.89	10.080	1.16	0.06073	3.11	630	66	610	7	609	7
7a-R	311	134	37	0.431	0.05	9.993	1.16	0.05942	0.83	9.997	1.16	0.05903	0.86	568	19	615	7	616	7
8a-C	264	84	31	0.319	0.10	10.018	1.26	0.05969	0.92	10.027	1.26	0.05893	0.99	565	21	613	7	614	8
8b-C	306	121	34	0.396	0.29	10.538	1.18	0.06214	0.89	10.568	1.18	0.05988	1.10	599	24	583	7	582	7
8c-R	280	94	32	0.336	0.08	10.167	1.18	0.05852	0.99	10.175	1.18	0.05789	1.05	526	23	604	7	606	7
9a-C	795	1167	118	1.468	14.07	8.924	1.24	0.17084	8.95	10.385	1.99	0.06201	39.61	674	677	593	11	590	20
14. Girgar (S-1561)
1a-C	85	108	12	1.270	1.37	9.806	1.22	0.06671	2.21	9.942	1.22	0.05601	4.53	453	98	618	7	621	7
1a-R	340	337	43	0.991	0.24	10.439	1.21	0.06355	1.31	10.465	1.21	0.06167	1.53	663	32	588	7	587	7
1b-C	411	381	53	0.926	0.49	10.038	1.21	0.06187	1.37	10.087	1.22	0.05810	1.92	533	41	609	7	611	7
1c-R	227	230	30	1.012	0.71	10.062	1.28	0.06244	1.48	10.134	1.29	0.05694	2.48	489	54	607	7	609	8
1d-R	118	87	14	0.737	{0.27}	10.536	1.22	0.06310	2.17		N/A			712	46	585	7	582	7
2a-C	601	508	77	0.845	0.15	10.196	1.21	0.06043	0.83	10.211	1.21	0.05928	0.94	577	20	602	7	603	7
2a-R	330	262	42	0.795	0.27	10.137	1.21	0.06078	1.16	10.164	1.21	0.05871	1.39	556	30	605	7	606	7
2b-C	111	126	15	1.132	1.06	10.200	1.21	0.06358	2.24	10.309	1.21	0.05533	3.64	426	79	597	7	600	7
2c-C	108	117	14	1.091	1.16	10.114	1.22	0.06540	2.21	10.233	1.22	0.05632	3.85	465	83	601	7	604	7
2c-R	179	90	19	0.503	0.69	11.164	1.22	0.06225	2.11	11.242	1.22	0.05686	2.98	486	65	549	6	550	7
2d-C	125	155	17	1.239	1.07	10.049	1.28	0.06547	1.84	10.157	1.29	0.05717	3.56	498	77	605	7	607	8
2d-R	53	44	6	0.837	6.68	11.519	1.21	0.11351	2.57	12.343	1.26	0.06185	11.75	669	233	502	6	499	8
3a-C	121	120	16	0.986	0.82	10.265	1.21	0.06361	1.78	10.350	1.21	0.05720	2.90	499	63	595	7	596	7
3a-R	65	52	9	0.796	0.69	9.724	1.22	0.06083	2.80	9.792	1.23	0.05541	4.00	429	87	627	7	631	8
3b-C	127	91	7	0.715	11.74	20.684	1.21	0.14638	2.79	23.435	1.28	0.05471	15.70	400	318	269	3	268	6
3b-R	140	115	18	0.820	0.41	10.177	1.21	0.06089	1.64	10.219	1.22	0.05766	2.18	517	47	602	7	604	7
3c-C	92	84	11	0.912	1.01	10.394	1.24	0.06213	2.06	10.500	1.24	0.05420	3.75	379	82	586	7	590	7
3c-R	88	65	11	0.737	1.08	10.105	1.22	0.06582	2.42	10.216	1.23	0.05740	4.68	507	100	602	7	604	7
15.Sahara (S-1542)
1a-C	817	442	97	0.542	0.51	10.082	1.21	0.06346	0.79	10.133	1.21	0.05952	1.31	586	28	607	7	607	7
1b-C	255	127	29	0.500	1.53	10.198	1.21	0.06948	1.54	10.356	1.21	0.05761	3.91	515	84	594	7	596	7
3a-C	264	117	30	0.445	1.36	9.993	1.21	0.06662	1.43	10.131	1.21	0.05600	3.68	452	80	607	7	610	7
3b-C	786	423	95	0.538	0.20	9.983	1.21	0.06168	0.83	10.004	1.21	0.06011	1.02	608	22	614	7	614	7
4a-C	240	113	26	0.470	1.09	10.598	1.21	0.06686	1.57	10.715	1.21	0.05841	2.82	545	60	575	7	576	7
4a-R	562	219	66	0.390	0.51	9.881	1.21	0.06246	1.26	9.931	1.21	0.05851	1.68	549	36	618	7	620	7
4b-C	363	101	40	0.278	1.64	10.134	1.21	0.07396	1.36	10.304	1.21	0.06123	3.12	647	66	597	7	596	7
4b-R	1052	689	126	0.655	0.30	10.221	1.21	0.06245	0.76	10.251	1.21	0.06016	0.99	609	21	600	7	600	7
5a-C	229	52	14	0.225	19.81	14.341	1.26	0.21429	0.85	17.884	1.37	0.06076	10.30	631	208	351	5	347	12
5a-R	673	211	77	0.313	0.15	10.101	�1.16	0.06135	0.66	10.116	1.16	0.06020	0.74	611	16	608	7	608	7
5b-R	1199	722	148	0.602	0.07	10.019	�1.16	0.06070	0.66	10.026	1.16	0.06015	0.69	609	15	613	7	613	7
5c-C	406	109	46	0.269	0.38	9.964	1.15	0.06220	1.18	10.002	1.16	0.05928	1.47	577	32	614	7	615	7
8a-C	211	107	25	0.507	1.86	9.894	1.21	0.07166	2.25	10.081	1.22	0.05721	4.67	500	100	610	7	612	7
16. Yehoshafat (AG-81)
1a-C	394	116	45	0.296	0.45	10.153	0.92	0.06315	0.61	10.199	0.92	0.05967	0.83	592	18	603	5	603	5
1a-R	156	91	19	0.580	{0.03}	10.234	1.18	0.06018	0.97		N/A			610	21	601	7	601	7
1b-C	156	67	19	0.431	{0.03}	10.082	0.84	0.05900	0.98		N/A			567	21	610	5	611	5
2a-C	186	149	24	0.801	{0.03}	10.224	0.87	0.05925	0.90		N/A			576	20	602	5	602	5
2a-R	251	169	31	0.672	0.19	10.241	1.09	0.06151	0.78	10.260	1.08	0.06008	0.88	606	19	600	6	599	6
2b-C	52	25	6	0.476	{0.21}	10.180	0.89	0.06205	2.13		N/A			676	45	604	5	603	5
2b-R	152	86	19	0.566	{0.06}	9.954	0.87	0.05921	0.99		N/A			575	21	617	5	618	5
2c-C	181	90	22	0.495	{0.00}	10.204	0.84	0.06023	0.93		N/A			612	20	603	5	602	5
2c-R	483	257	58	0.532	1.35	10.091	1.11	0.06939	0.55	10.230	1.10	0.05889	1.07	563	23	601	6	602	7
2d-C	158	123	21	0.783	{0.00}	9.998	0.84	0.05954	1.01		N/A			587	22	615	5	615	5
3a-C	93	65	12	0.695	{0.08}	10.216	1.10	0.06025	1.29		N/A			612	28	602	6	602	6
3a-R	186	143	24	0.769	{0.00}	10.273	0.99	0.05993	0.93		N/A			601	20	599	6	599	6
17. Timna alkali granite (AG-68)
1a-C	377	151	36	0.401	1.74	12.363	0.85	0.07269	0.83	12.582	0.85	0.05918	1.63	574	35	493	4	492	4
1b-C	188	173	25	0.923	{0.00}	10.191	0.93	0.05954	1.10		N/A			587	24	603	5	604	5
1b-R	154	134	20	0.867	{0.04}	10.160	0.84	0.06086	1.21		N/A			634	26	605	5	605	5
1c-C	151	150	20	0.997	{0.01}	10.234	0.92	0.06157	1.47		N/A			659	31	601	5	600	5
1c-R	231	150	28	0.650	0.17	10.168	0.86	0.06090	0.92	10.185	0.86	0.05960	1.03	589	22	604	5	604	5
1d-R	91	69	11	0.763	{0.00}	10.171	0.85	0.06087	1.57		N/A			635	33	605	5	604	5
1e-C	165	167	20	1.011	0.30	11.657	0.84	0.06357	1.26	11.692	0.84	0.06127	1.47	649	31	529	4	527	4
1f-C	156	122	20	0.781	{0.00}	10.078	0.88	0.06028	1.26		N/A			614	27	610	5	610	5
1f-R	145	71	17	0.487	{0.03}	10.132	0.85	0.05928	1.18		N/A			578	25	607	5	607	5
2a-C	104	74	13	0.708	{0.14}	9.987	0.85	0.05888	1.48		N/A			563	32	615	5	616	5
2a-R	850	1385	126	1.630	0.10	10.184	0.86	0.06162	0.51	10.194	0.86	0.06087	0.56	635	12	603	5	603	5
3a-C1	231	182	27	0.790	0.38	10.957	0.84	0.06208	0.86	10.999	0.84	0.05912	1.16	571	25	561	5	561	5
3a-C	118	86	15	0.728	{0.08}	10.079	1.01	0.05924	1.30		N/A			576	28	610	6	611	6
18. Timna monzodiorite (AG-77)
1b-R	298	185	36	0.620	0.90	10.246	0.84	0.06810	1.49	10.338	0.84	0.06115	2.24	644	47	595	5	594	5
1c-C	165	150	21	0.904	0.74	10.239	0.85	0.06801	1.62	10.316	0.85	0.06227	2.37	683	50	596	5	595	5
2a-C	79	84	10	1.065	{0.29}	10.268	0.84	0.06013	1.88		N/A			608	40	599	5	599	5
3a-C	148	148	20	0.995	{0.21}	10.100	0.85	0.06182	1.25		N/A			668	27	609	5	607	5
4a-C	173	231	24	1.337	{0.19}	10.192	0.84	0.06025	1.21		N/A			612	26	603	5	603	5
4a-R	120	148	16	1.232	{0.05}	10.630	0.85	0.06030	1.51		N/A			614	32	580	5	579	5
4b-C	72	78	10	1.081	{0.13}	10.273	0.86	0.06105	2.11		N/A			641	45	599	5	598	5
4c-C	276	413	40	1.496	{0.10}	10.096	0.84	0.05947	1.00		N/A			584	21	609	5	609	5
4d-C	196	253	27	1.288	{0.10}	10.243	0.84	0.06084	1.31		N/A			634	28	600	5	600	5
4e-R	148	124	19	0.842	0.30	10.050	0.84	0.05760	1.42	10.081	0.84	0.05522	1.72	421	38	610	5	613	5
19. Umm-Shomer (S-1886)
1a-C	395	308	45	0.778	9.94	10.173	1.09	0.13253	1.08	11.296	1.11	0.05494	6.34	410	136	547	6	549	9
1b-R	121	74	14	0.615	{0.00}	10.664	1.17	0.05859	3.35		N/A			552	72	578	6	578	7
2a-C	125	118	17	0.945	27.00	7.559	1.24	0.26315	2.32	10.355	1.61	0.05139	26.20	258	511	594	9	599	29
3a-R	179	133	22	0.746	5.48	9.713	0.94	0.10112	2.81	10.276	0.97	0.05855	7.84	551	163	599	6	599	7
4a-C	92	51	11	0.554	{0.40}	10.629	0.96	0.05965	2.36		N/A			591	50	580	5	579	6
4b-C	344	273	36	0.791	0.90	12.477	0.94	0.06494	1.27	12.591	0.94	0.05792	2.17	527	47	493	4	492	5
4b-R	299	222	36	0.743	0.19	10.738	0.93	0.06088	1.40	10.758	0.93	0.05939	1.56	582	34	573	5	573	5
5a-C	143	93	17	0.652	{0.04}	10.236	1.00	0.06177	1.83		N/A			666	39	601	6	599	6
5b-C	193	160	24	0.831	0.66	10.553	0.94	0.06380	1.58	10.623	0.94	0.05868	2.32	555	50	580	5	580	5
6a-C	148	153	20	1.028	{0.05}	10.179	0.92	0.06190	1.66		N/A			671	35	604	5	603	5
6a-R	196	95	23	0.488	{0.23}	10.540	0.92	0.06135	1.62		N/A			651	34	584	5	583	5
6b-C	85	38	9	0.453	{0.22}	10.665	0.97	0.05974	2.30		N/A			594	49	578	5	577	6
6c-C	66	28	8	0.427	{0.31}	10.343	0.95	0.05827	2.60		N/A			540	56	595	5	596	6
7a-C	254	250	32	0.984	20.55	8.917	0.97	0.22188	2.38	11.222	1.26	0.06318	16.68	714	319	550	7	546	20
7a-R	123	71	14	0.575	0.37	10.269	0.91	0.05982	2.64	10.307	0.92	0.05691	3.10	488	67	597	5	599	5
20. Sharm (S-1518)
5a-R	147	49	16	0.332	1.38	10.250	1.18	0.06724	1.86	10.393	1.18	0.05651	3.21	473	69	592	7	595	7
5b-C	87	21	9	0.245	1.16	10.345	1.19	0.06698	1.70	10.467	1.19	0.05797	3.16	529	68	588	7	589	7
6a-C	122	38	14	0.308	1.66	10.089	1.19	0.07093	2.65	10.260	1.19	0.05800	4.43	530	94	600	7	601	7
6a-R	137	41	15	0.299	1.34	10.237	1.19	0.06944	1.31	10.376	1.19	0.05906	3.03	569	65	593	7	594	7
6b-C	108	35	12	0.322	0.53	10.256	1.19	0.06227	1.55	10.311	1.19	0.05819	2.09	537	45	597	7	598	7
7a-C	157	54	18	0.345	{0.19}	10.367	1.18	0.06136	1.29		N/A			652	27	594	7	592	7
7a-R	149	44	16	0.294	0.46	10.498	1.18	0.06397	1.45	10.547	1.18	0.06037	1.87	617	40	584	7	583	7
7b-CR	101	34	11	0.341	0.97	10.247	1.18	0.06632	1.80	10.348	1.18	0.05878	2.81	559	60	595	7	595	7
7c-C	95	40	11	0.423	0.68	10.405	1.18	0.06177	2.08	10.476	1.18	0.05646	2.90	471	63	588	7	590	7
7c-R	96	24	10	0.255	0.85	10.387	1.18	0.06213	1.70	10.476	1.18	0.05550	2.84	432	62	588	7	591	7
8a-C	92	33	11	0.358	0.43	10.143	1.18	0.06166	1.64	10.187	1.18	0.05830	2.15	541	46	604	7	605	7
8a-R	136	58	16	0.428	0.36	10.173	1.18	0.06151	1.42	10.210	1.18	0.05869	1.82	556	39	602	7	603	7
10a-C	105	41	12	0.394	1.61	10.296	1.19	0.06882	2.05	10.464	1.19	0.05629	3.80	464	82	588	7	591	7
10b-C	131	62	15	0.474	1.17	10.256	1.18	0.06566	2.40	10.378	1.19	0.05652	3.81	473	82	593	7	595	7
10c-C	122	38	13	0.315	0.95	10.315	1.18	0.06741	1.49	10.414	1.19	0.06003	3.18	605	67	591	7	591	7
21. Dahab (S-3896)
1a-C	130	68	15	0.525	{0.09}	10.304	1.10	0.05957	1.38		N/A			588	30	597	6	597	6
1b-C	91	43	11	0.470	0.35	10.187	1.12	0.05872	1.73	10.223	1.12	0.05597	2.37	451	52	602	6	605	7
2a-C	254	116	29	0.458	0.11	10.468	1.10	0.06047	1.09	10.479	1.10	0.05962	1.19	590	26	588	6	588	6
2a-R	105	39	9	0.369	0.92	13.965	1.11	0.06451	2.39	14.095	1.11	0.05736	3.58	505	77	442	5	441	5
2b-C	184	100	22	0.542	0.21	10.321	1.09	0.06052	1.35	10.343	1.09	0.05885	1.64	562	35	595	6	596	6
2b-R	123	64	14	0.521	0.25	10.473	1.10	0.06168	1.65	10.498	1.10	0.05976	1.96	595	42	587	6	586	6
2c-C	109	46	12	0.417	{0.10}	10.580	1.10	0.06176	1.80		N/A			666	38	582	6	580	6
5a-C	203	97	23	0.477	0.26	10.725	1.09	0.05940	1.39	10.753	1.09	0.05736	1.67	505	36	573	6	575	6
5b-C	156	56	17	0.360	0.24	10.403	1.10	0.05861	1.90	10.428	1.10	0.05672	2.19	481	48	590	6	592	6
5c-C	76	38	9	0.502	0.50	10.459	1.10	0.06059	2.26	10.511	1.11	0.05670	3.14	480	68	586	6	588	6
22. Umm-I-Fai (S-4403)
6a-C	304	150	34	0.493	1.64	10.482	1.09	0.07000	3.00	10.657	1.10	0.05726	5.43	502	115	578	6	580	6
6a-R	2003	886	228	0.442	1.08	10.373	1.09	0.06814	0.56	10.486	1.09	0.05980	0.83	597	18	587	6	587	6
6b-C	817	388	86	0.474	1.94	11.239	1.09	0.07230	0.61	11.462	1.09	0.05717	1.46	498	32	539	6	540	6
6c-C	903	479	104	0.531	0.55	10.534	1.09	0.06309	0.57	10.592	1.09	0.05884	0.83	561	18	582	6	582	6
9a-C	825	439	97	0.532	0.04	10.318	1.09	0.06015	0.63	10.322	1.09	0.05982	0.66	597	14	596	6	596	6
9b-C	966	539	114	0.558	0.05	10.328	1.09	0.05930	0.60	10.334	1.09	0.05889	0.64	563	14	595	6	596	6
9c-R	1481	698	169	0.471	0.20	10.462	1.09	0.06080	0.50	10.483	1.09	0.05922	0.59	575	13	587	6	588	6
10a-R	1253	411	138	0.328	0.20	10.473	1.09	0.06147	0.54	10.493	1.09	0.05994	0.63	601	14	587	6	586	6
10b-C	1867	1094	213	0.586	1.03	10.667	1.09	0.06683	0.44	10.779	1.09	0.05880	0.79	560	17	572	6	572	6
23. Katherina (DV-82-87)
1a-C	94	41	11	0.432	{0.20}	10.619	0.99	0.06237	1.84		N/A			687	39	580	6	578	6
2a-R	156	96	19	0.616	0.33	10.559	0.93	0.06085	1.51	10.594	0.93	0.05831	1.89	541	41	581	5	582	5
2b-C	77	38	9	0.498	{0.05}	10.651	0.94	0.05954	2.02		N/A			587	43	579	5	578	5
2c-C	521	473	30	0.907	1.23	24.418	1.10	0.06966	1.27	24.722	1.10	0.06012	2.13	608	45	256	3	253	3
3a-C	36	27	4	0.764	1.44	10.528	0.96	0.06051	2.84	10.682	0.98	0.04917	6.18	156	139	577	5	584	6
3b-C	741	327	34	0.441	7.17	26.274	0.97	0.11717	2.01	28.303	1.00	0.06168	6.85	663	140	224	2	221	3
3c-C	43	25	5	0.580	{0.22}	10.707	0.96	0.06454	2.59		N/A			759	54	576	5	572	6
3d-C	279	134	33	0.481	{0.07}	10.344	0.92	0.05967	1.03		N/A			591	22	595	5	595	5
4b-C	204	88	23	0.430	{0.10}	10.504	0.92	0.05969	1.20		N/A			592	26	586	5	586	5
8a-C	205	140	25	0.684	{0.03}	10.637	0.94	0.05986	1.29		N/A			598	28	579	5	579	5
8a-r	155	71	18	0.456	{0.10}	10.403	0.91	0.05995	1.39		N/A			602	30	592	5	591	5
24. Iqna (YS-503)
3a-C	74	22	8	0.297	0.48	10.482	1.11	0.06044	2.44	10.533	1.11	0.05667	3.21	479	69	585	6	587	6
3a-R	150	55	17	0.366	{0.12}	10.654	0.93	0.06067	1.58		N/A			628	34	578	5	577	5
3b-C	7008	2298	592	0.328	1.09	13.687	0.94	0.06809	0.27	13.837	0.94	0.05963	0.49	590	11	450	4	448	4
3c-C	6164	1887	726	0.306	0.03	9.772	0.91	0.05983	0.31	9.775	0.91	0.05959	0.32	589	7	628	5	629	6
3d-C	3380	1299	397	0.384	{0.00}	10.003	0.91	0.05975	0.34		N/A			594	7	614	5	615	5
3e-C	3392	1283	349	0.378	0.06	11.422	0.91	0.06036	0.37	11.428	0.91	0.05991	0.39	600	8	541	5	540	5
4a-C	570	383	68	0.673	4.60	10.367	0.91	0.09673	0.70	10.868	0.91	0.06107	2.43	642	51	567	5	566	6
4b-R	600	188	65	0.314	0.08	10.705	0.91	0.05964	0.81	10.713	0.91	0.05904	0.86	569	19	575	5	575	5
4b-C	369	124	40	0.337	0.11	10.693	0.92	0.05998	1.01	10.705	0.92	0.05909	1.10	570	24	576	5	576	5
4c-C	6530	2195	764	0.336	0.02	10.005	0.91	0.05988	0.30	10.007	0.91	0.05976	0.31	595	7	614	5	614	5
4d-R2	521	384	33	0.737	1.52	19.229	1.10	0.06804	0.99	19.527	1.10	0.05615	2.34	458	51	322	3	321	4
4d-R3	2536	1033	287	0.407	0.03	10.470	1.09	0.06010	0.39	10.473	1.09	0.05984	0.40	598	9	588	6	588	6
5a-C	256	72	22	0.280	0.28	13.542	1.10	0.06050	1.20	13.579	1.10	0.05836	1.46	543	32	458	5	457	5
